# Supplementary material for: An allosteric inhibitor targeting the STAT3 coiled-coil domain selectively suppresses proliferation of breast cancer
Source: Royal Society of Chemistry journal article supplement (doi:10.1039/d4md00926f), 2025-01-01
Supplement: d4md00926f1.pdf [file d4md00926f1.pdf]

## The Allosteric Inhibitor Targeting STAT3 Coiled-Coil Domain, Selectively Suppresses Proliferation of Breast Cancer

### Supplementary Information

#### K116

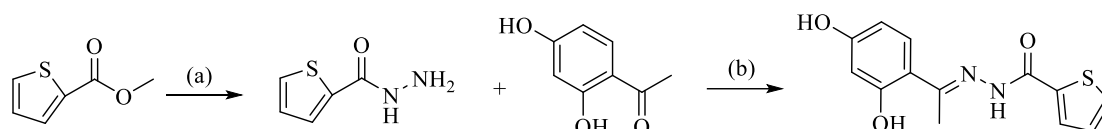

Reagents and conditions: (a) Hydrazinium hydroxide, MeOH, reflux; (b) AcOH, EtOH, reflux.

#### Step 1

A mixture of methyl thiophene-2-carboxylate (500 mg, 3.52 mmol) and Hydrazine hydrate (1 ml) in 10 ml MeOH was refluxed for 4 hours. The mixture was concentrated under vacuum and filtered to afford thiophene-2-carbohydrazide (300.0 mg, 60.0% yield) as a clear crystal.

#### Step 2

A mixture of thiophene-2-carbohydrazide (300 mg, 2.11 mmol), 1-(2,4-dihydroxyphenyl)ethan-1-one (385.2 mg, 2.53 mmol) and AcOH (0.2 ml) in 10 ml EtOH was refluxed for 4 hours. The mixture was concentrated under vacuum and filtered to afford (E)-N'-(1-(2,4-dihydroxyphenyl)ethylidene)thiophene-2-carbohydrazide (K116) (430.0 mg) as a brown solid, 73.8% yield.  $[M+H]^+ = 276.99$

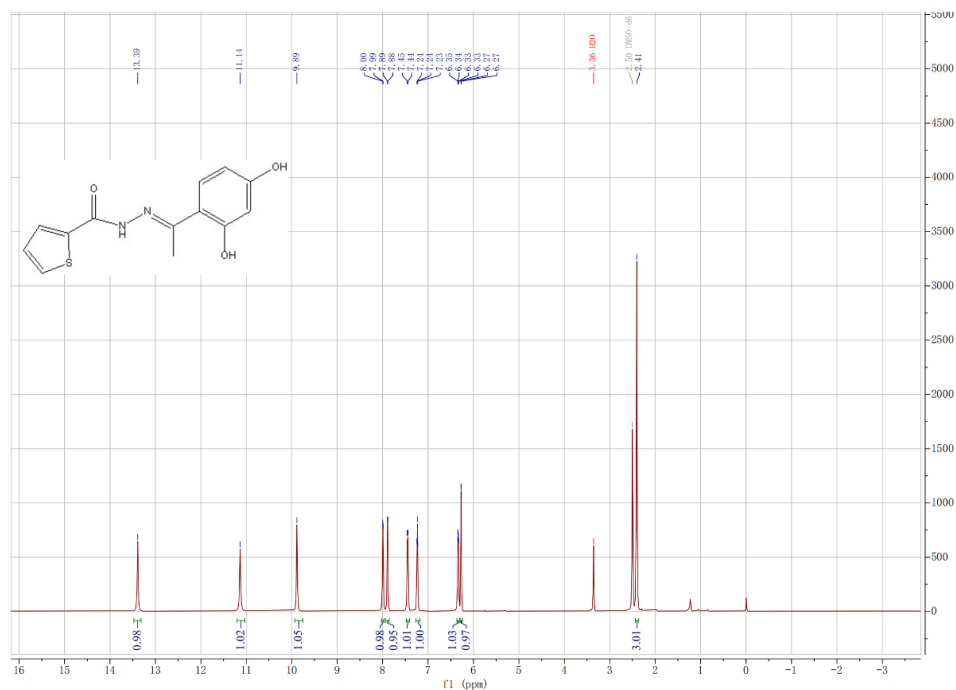

<sup>1</sup>H NMR (600 MHz, DMSO-d<sub>6</sub>) δ 13.39 (s, 1H), 11.14 (s, 1H), 9.89 (s, 1H), 8.00 (s, 1H), 7.89 (d, J = 5.1 Hz, 1H), 7.45 (d, J = 8.6 Hz, 1H), 7.24 (t, 1H), 6.37 - 6.31 (m, 1H), 6.30 - 6.25 (m, 1H), 2.41 (s, 3H).

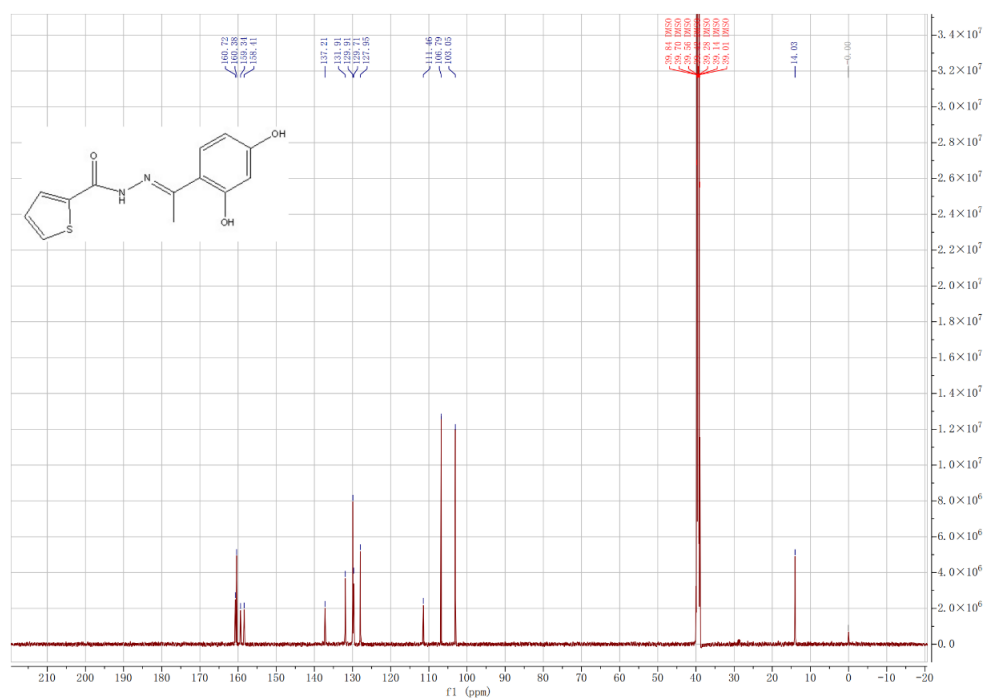

<sup>13</sup>C NMR (151 MHz, DMSO-d<sub>6</sub>) δ 160.72, 160.38, 159.34, 158.41, 137.21, 131.91, 129.91, 129.71, 127.95, 111.46, 106.79, 103.05, 14.03.

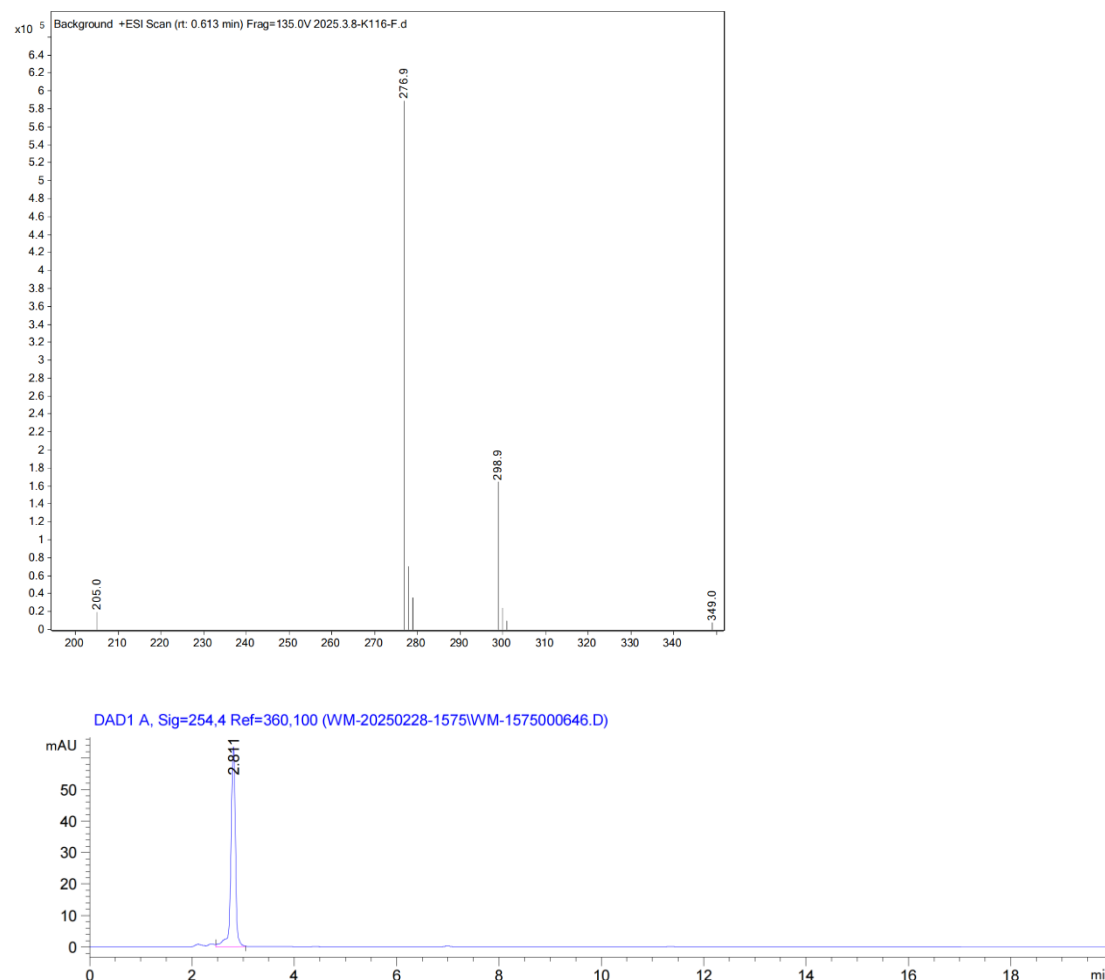

HPLC Conditions: XBridge C18 column (5  $\mu$ m particle size, 4.6 mm  $\times$  250 mm; Waters, USA) with a mobile phase consisting of acetonitrile and water (70:30, v/v), with the water containing 0.1% TFA, at a flow rate of 1.0 mL/min.

**Figure S1. The synthetic procedures and NMR, MS spectra copies and HPLC of K116**

### K134

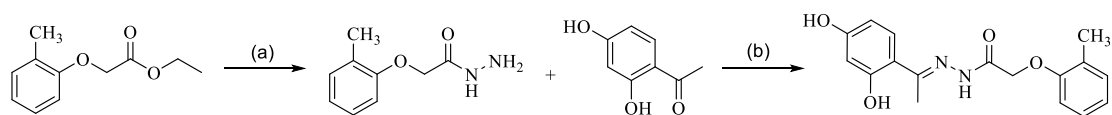

Reagents and conditions: (a) Hydrazinium hydroxide 85%, EtOH, 80°C (b) Pyridine, EtOH, 80°C.

#### Step 1

To a stirred solution of ethyl 2-(o-tolyloxy)acetate (1eq) in anhydrous ethyl alcohol was added hydrazinium hydroxide 85% (2eq). The mixture was refluxed at 80°C overnight. Cooled the reaction solution to room temperature and poured into ice water. Filtered the white precipitate and washed the white precipitate with ethyl alcohol and water.

Dried in a vacuum oven to obtain 2-(o-tolyloxy)acetohydrazide as white solid, 53% yield.

## Step 2

To a stirred solution of 2-(o-tolyloxy)acetohydrazide (1eq) in anhydrous ethyl alcohol was added 1-(2,4-dihydroxyphenyl)ethan-1-one (1.1eq) and anhydrous pyridine (0.1eq). The mixture was refluxed at 80 °C overnight. Cooled the reaction solution to room temperature. Filtered the white precipitate and washed with anhydrous ethyl alcohol. Dried in a vacuum oven to obtain (*E*)-*N'*-(1-(2, 4-dihydroxyphenyl)ethylidene)-2-(o-tolyloxy)acetohydrazide (**K134**) as white solid, 10% yield.

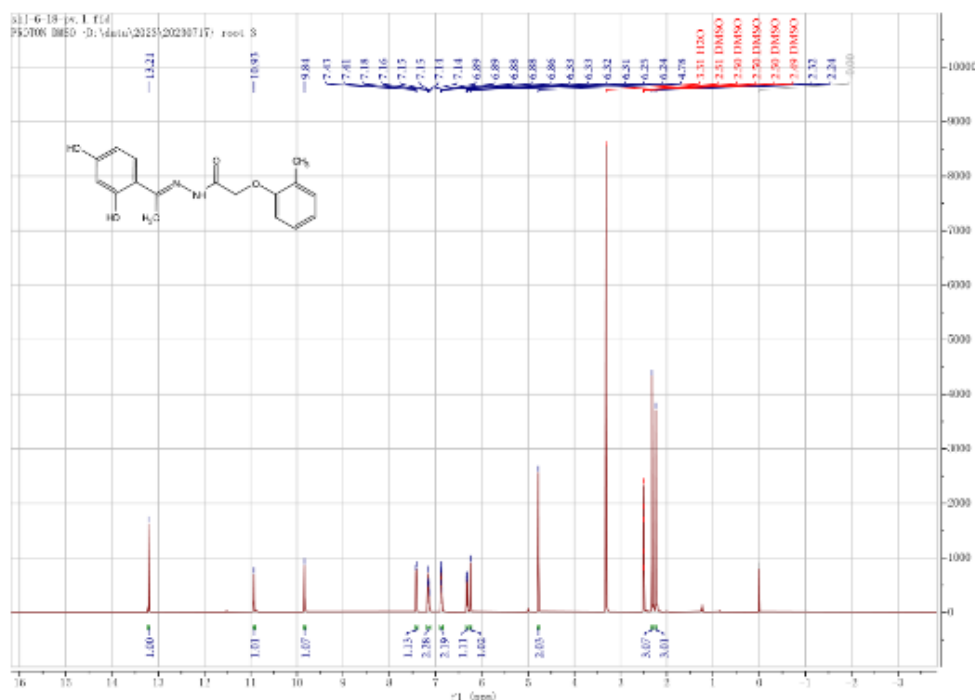

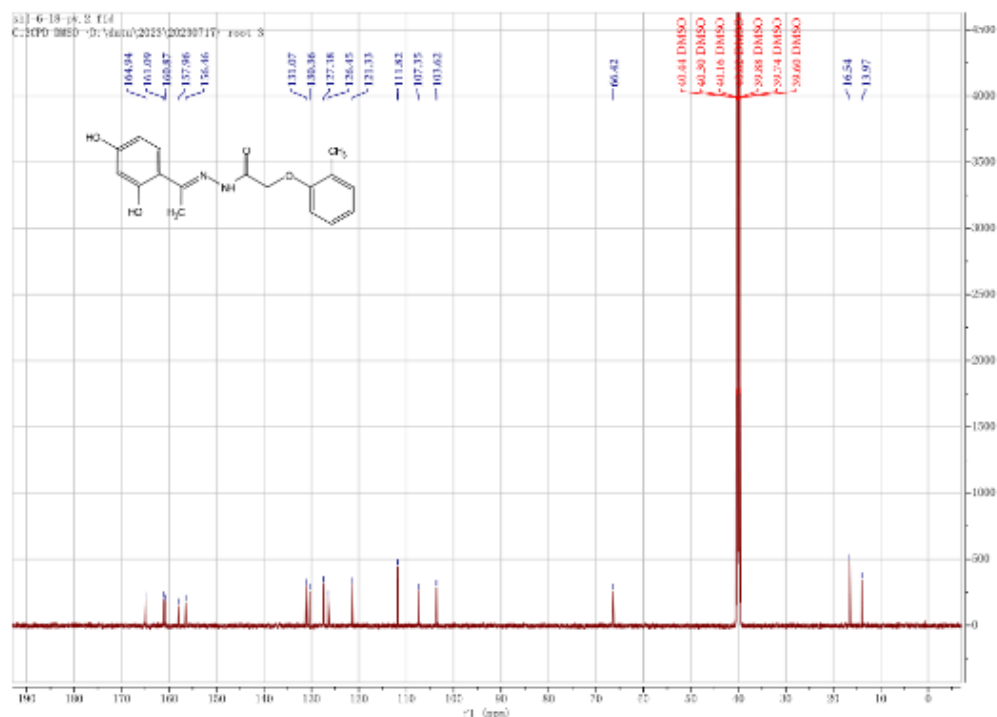

$^{13}\text{C}$  NMR (150 MHz,  $\text{DMSO}-d_6$ )  $\delta$  164.94, 161.09, 160.87, 157.96, 156.46, 131.07, 130.36, 127.38, 126.45, 121.33, 111.82, 107.35, 103.62, 66.42, 16.54, 13.97; MS-ESI ( $m/z$ ): 315.2 ( $\text{M}+\text{H}$ ) $^+$ .

**Figure S2.** The synthetic procedures and the NMR spectrum data of K134.

## K114

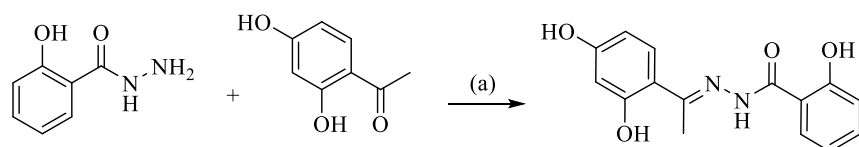

Reagents and conditions: (a)  $\text{AcOH}$ ,  $\text{EtOH}$ ,  $80^\circ\text{C}$ .

To a stirred solution of 2-hydroxybenzohydrazide (1 eq) in anhydrous ethyl alcohol was added 1-(2,4-dihydroxyphenyl)ethan-1-one (1 eq) and acetic acid (0.4eq). The mixture was refluxed at  $80^\circ\text{C}$  for 3 hours. Cooled the reaction solution to room temperature. Filtered the white precipitate and washed with anhydrous ethyl alcohol. Dried in a vacuum oven to obtain (*E*)- $\text{N}'$ -(1-(2,4-dihydroxyphenyl)ethylidene)-2-hydroxybenzohydrazide (**K114**) as white solid, 30% yield.

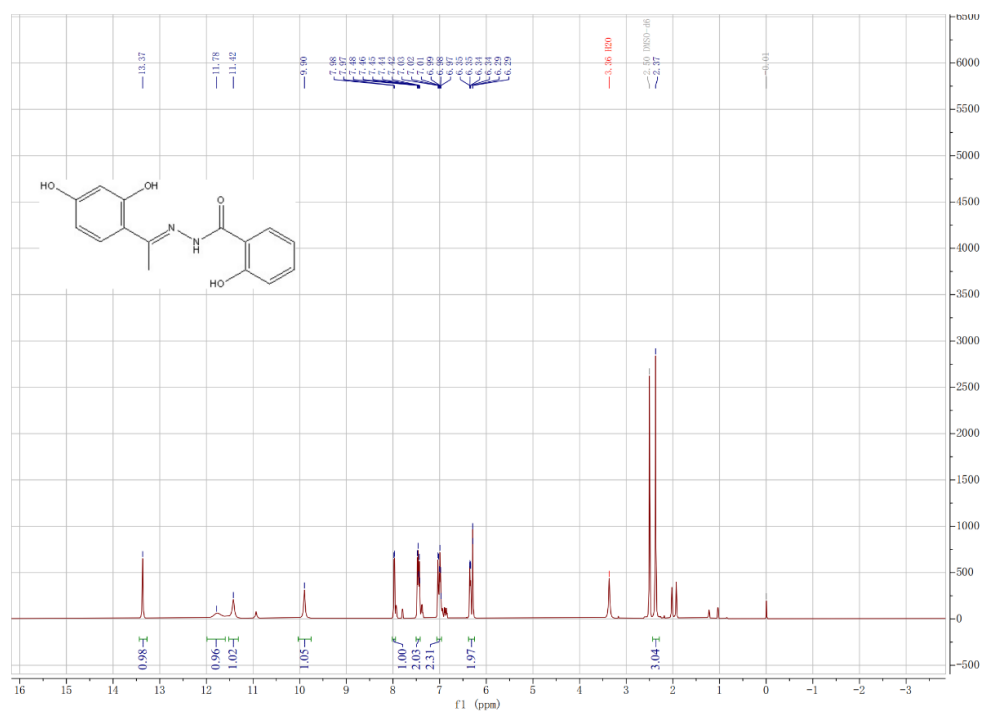

<sup>1</sup>H NMR (600 MHz, DMSO-d<sub>6</sub>) δ 13.37 (s, 1H), 11.78 (s, 1H), 11.42 (s, 1H), 9.90 (s, 1H), 7.97 (d, J = 7.8 Hz, 1H), 7.50 - 7.42 (m, 2H), 7.06 - 6.96 (m, 2H), 6.38 - 6.25 (m, 2H), 2.37 (s, 3H).

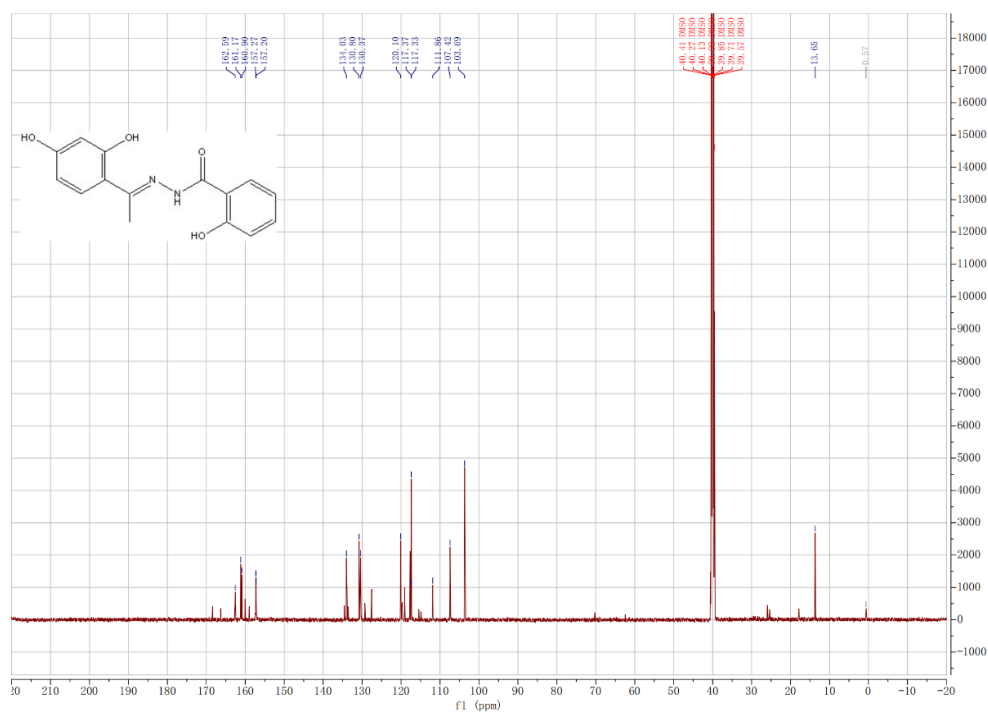

<sup>13</sup>C NMR (151 MHz, DMSO-d<sub>6</sub>) δ 162.59, 161.17, 160.90, 157.27, 157.20, 134.03, 130.80, 130.37, 120.10, 117.37, 117.33, 111.86, 107.42, 103.69, 13.65.

**Figure S3. The synthetic procedures and the NMR spectrum data of K114.**

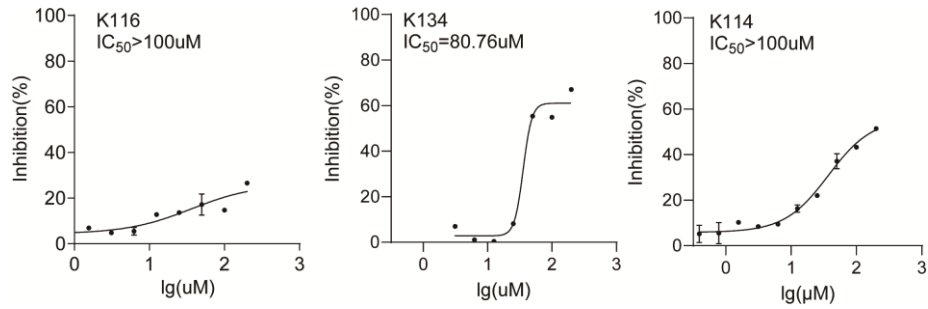

**Figure S4.** Inhibitory effect of K116, K134 and K114 on AC16 cells. The cell proliferation was analyzed using the CCK8 assay. Half-maximal inhibitory concentrations were determined using GraphPad Prism10. The data are representative of three independent studies. The data represent as the means  $\pm$  SEMs, \* $P < 0.05$ , \*\* $P < 0.01$ .

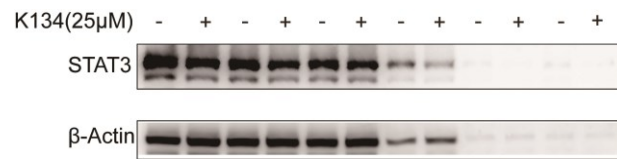

**Figure S5.** CETSA-WB experiment to further confirm the interaction between K134 (25 $\mu$ M) and STAT3.

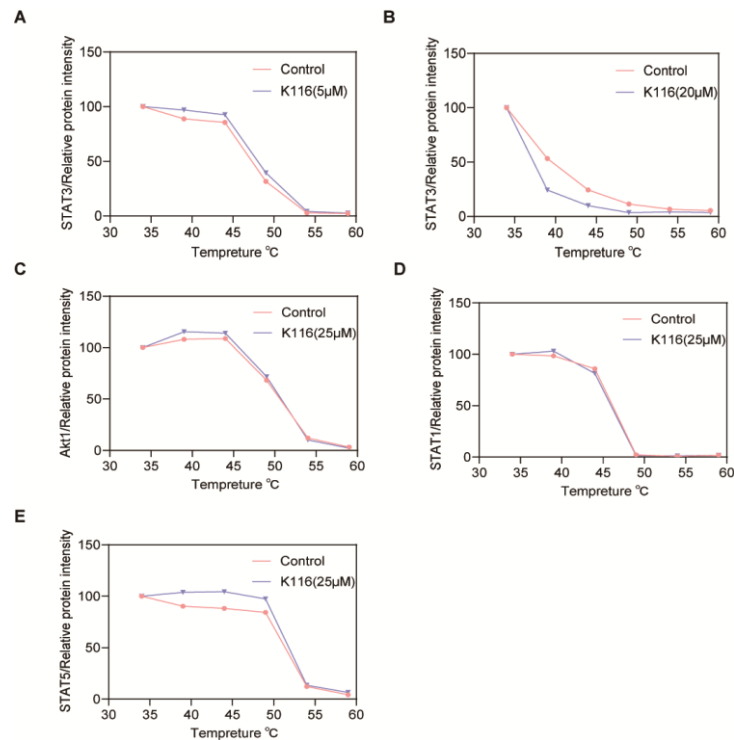

**Figure S6.** (A) The thermal stabilities of the STAT3 with or without K116 (5 $\mu$ M). (B) The thermal stabilities of the STAT3 with or without K116 (20 $\mu$ M). (C) The thermal stabilities of the Akt with or without K116 (25 $\mu$ M). (D) The thermal stabilities of the STAT1 with or without K116 (25 $\mu$ M). (E) The thermal stabilities of the STAT5 with or without K116 (25 $\mu$ M).

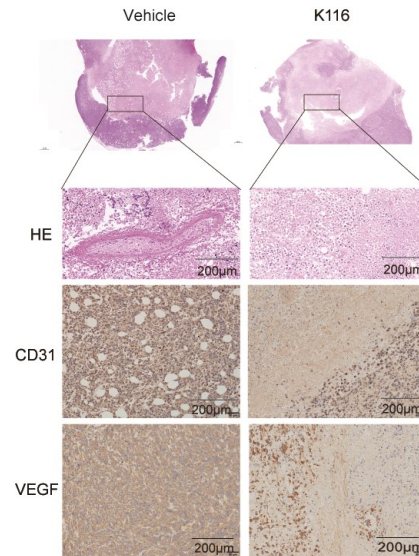

**Figure S7. Representative tissue sections from representative angiogenesis of xenograft tumors stained with H&E.** Immunohistochemical analysis was performed for CD31 and VEGF staining after treatment of xenograft tumors with vehicle or K116. Representative images ( $\times 20$  magnification) are shown. Scale bars = 200  $\mu\text{m}$ .

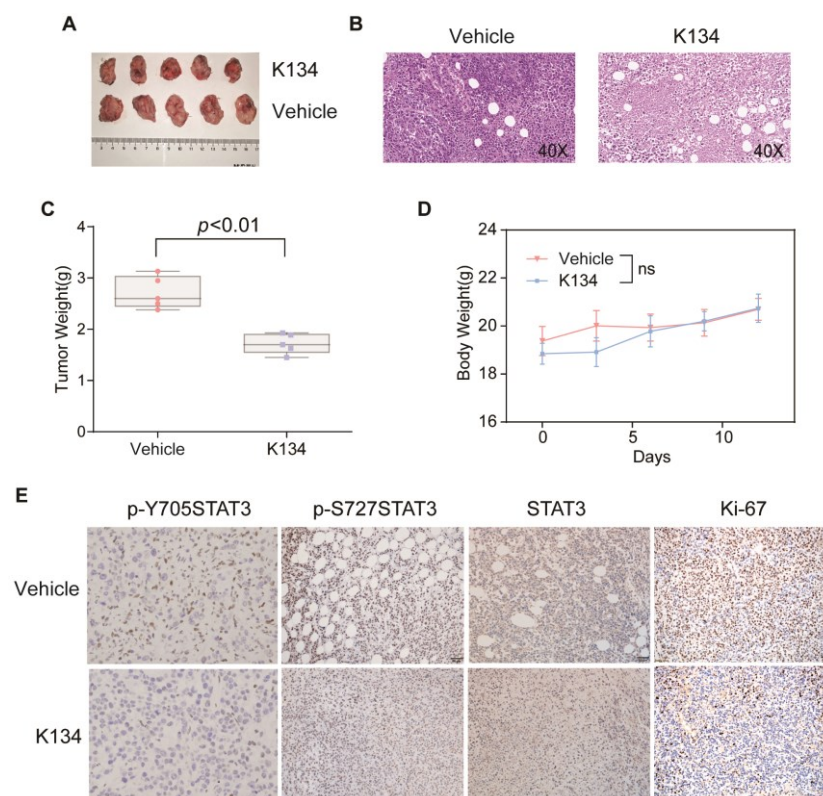

**Figure S8. K134 displayed antitumor efficacy in 4T1 cell-derived xenografts.** (A) Representative image of 4T1 xenograft tumors dissected from C57 mice treated intraperitoneally with vehicle or 30 mg/kg K134 every other day for 18 days ( $n = 5$ ). (B) Representative tissue sections from representative xenograft tumors stained



with H&E. (C) Tumor weights in different groups of mice ( $n = 5$ ). (D) Body weights in different groups of mice ( $n = 5$ ). (E) Immunohistochemical analysis was performed for pY705STAT3, pS727STAT3, STAT3, and Ki-67 staining after treatment of xenograft tumors with vehicle or K134. Representative images ( $\times 20$  magnification) are shown. Scale bars = 200  $\mu\text{m}$ . The data are presented as means  $\pm$  SEMs,  $^*P < 0.05$ ,  $^{**}P < 0.01$ , and  $^{***}P < 0.001$ , ns, not significant.

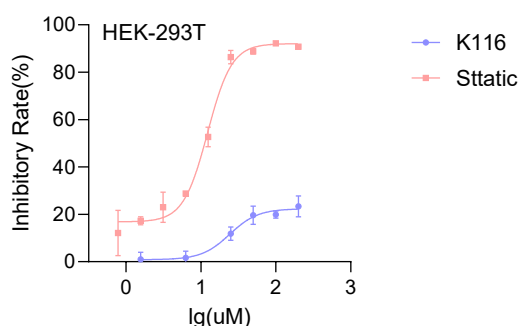

**Figure S9.** The cell viability of AC16 and HEK-293T cells treated with K116.

**Table S1.** IC<sub>50</sub> values of K116 in cancer cell lines.

| Cell line  | IC <sub>50</sub> $\pm$ SEMs ( $\mu\text{M}$ ) |
|------------|-----------------------------------------------|
| MDA-MB-468 | 4.8 $\pm$ 0.7                                 |
| MCF-7      | 15.2 $\pm$ 2.2                                |
| 4T1        | 6.7 $\pm$ 2.7                                 |
| Huh7       | >100                                          |
| SMMC-7721  | >100                                          |
| BEL-7404   | >100                                          |
| A549       | 66.2 $\pm$ 2.9                                |
| MKN45      | >100                                          |
| HGC-27     | >100                                          |

\*The IC<sub>50</sub>  $\pm$  SEMs values of K116 to the indicated cancer cell lines were determined by CCK8 assays. The value of each K116 treatment group was calculated as a percentage change of the DMSO controls, which represents the viability of the cancer cell lines. The data represent the mean  $\pm$  SEMs of three independent experiments.

**Table S2.** IC<sub>50</sub> values of K134 in cancer cell lines.

| Cell line  | IC <sub>50</sub> $\pm$ SEMs ( $\mu\text{M}$ ) |
|------------|-----------------------------------------------|
| MDA-MB-468 | 14.21 $\pm$ 1.9                               |
| 4T1        | 9.37 $\pm$ 0.97                               |
| MCF-7      | >100                                          |
| MKN28      | >100                                          |
| MKN45      | >100                                          |

\*The IC<sub>50</sub> ± SEMs values of K134 to the indicated cancer cell lines were determined by CCK8 assays. The value of each K134 treatment group was calculated as a percentage change of the DMSO controls, which represents the viability of the cancer cell lines. The data represent the mean ± SEMs of three independent experiments.

**Table S3.** IC<sub>50</sub> values of K114 in cancer cell lines.

| Cell line  | IC <sub>50</sub> ± SEMs (μM) |
|------------|------------------------------|
| MDA-MB-468 | 9.98 ± 2.14                  |
| 4T1        | 11.07 ± 0.96                 |
| MKN28      | >100                         |
| MKN45      | >100                         |
| HGC-27     | >100                         |

\*The IC<sub>50</sub> ± SEMs values of K114 to the indicated cancer cell lines were determined by CCK8 assays. The value of each K114 treatment group was calculated as a percentage change of the DMSO controls, which represents the viability of the cancer cell lines. The data represent the mean ± SEMs of three independent experiments.

**Table S4.** Primary antibodies used for western blots.

| Antibody name             | Company name              | Catalog number | Dilution |
|---------------------------|---------------------------|----------------|----------|
| Phospho-Stat3<br>(Tyr705) | Cell Signaling Technology | #9145          | 1:1000   |
| Stat3 (124H6)             | Cell Signaling Technology | #9139          | 1:1000   |
| Phospho-Stat3<br>(Ser727) | Cell Signaling Technology | #9134          | 1:1000   |
| Phospho-Stat1<br>(Tyr701) | Cell Signaling Technology | #9167          | 1:500    |
| Phospho-Stat5<br>(Tyr694) | Cell Signaling Technology | #9359          | 1:500    |
| Phospho-Akt<br>(Ser473)   | Cell Signaling Technology | #4060          | 1:1000   |
| Phospho-Stat3<br>(Ser727) | Abcam                     | Ab32143        | 1:1000   |
| β-actin                   | Proteintech               | HRP-60008      | 1:5000   |
